# Supplementary material for: Vapochromic features of new luminogens based on julolidine-containing styrene copolymers
Source: Royal Society of Chemistry journal article supplement (doi:10.1039/c6fd00151c), 2016-07-06
Supplement: c6fd00151c1.pdf [file c6fd00151c1.pdf]

**Electronic supplementary information (ESI) of the manuscript entitled “Vapochromic features of new luminogens based on julolidine-containing styrene copolymers” by Giuseppe Iasilli, Fabio Martini, Pierpaolo Minei, Giacomo Ruggeri and Andrea Pucci**

Corresponding author:

Andrea Pucci, Dipartimento di Chimica e Chimica Industriale, Università di Pisa, Pisa, Italy;  
e-mail: andrea.pucci@unipi.it

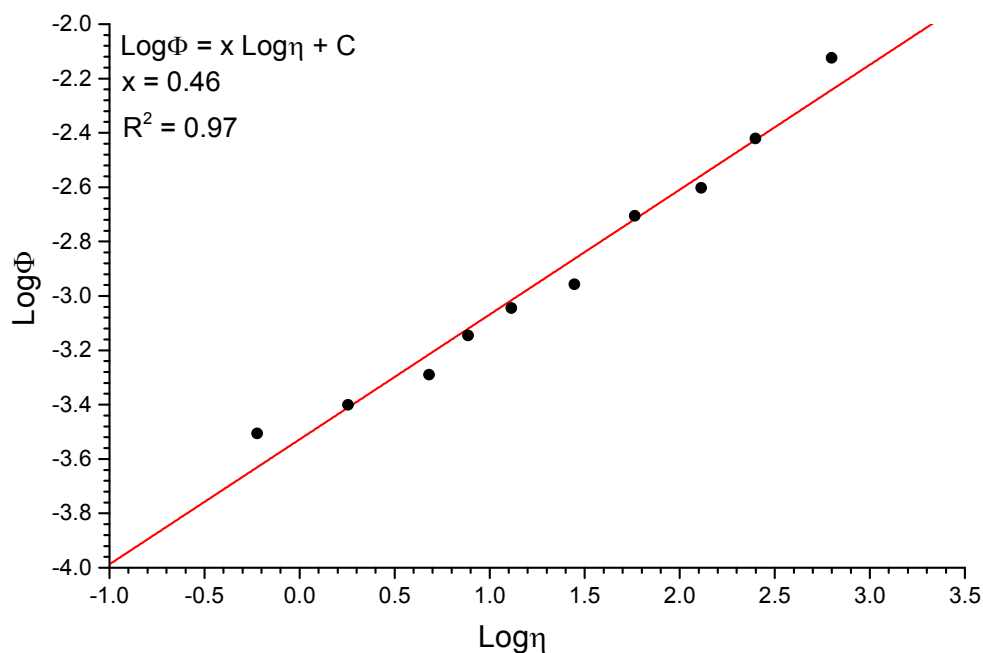

**Figure S1.** Förster-Hoffmann relationship of  $5 \cdot 10^{-6}$  M JCAEM solutions in methanol/glycerol mixtures with different glycerol volume contents

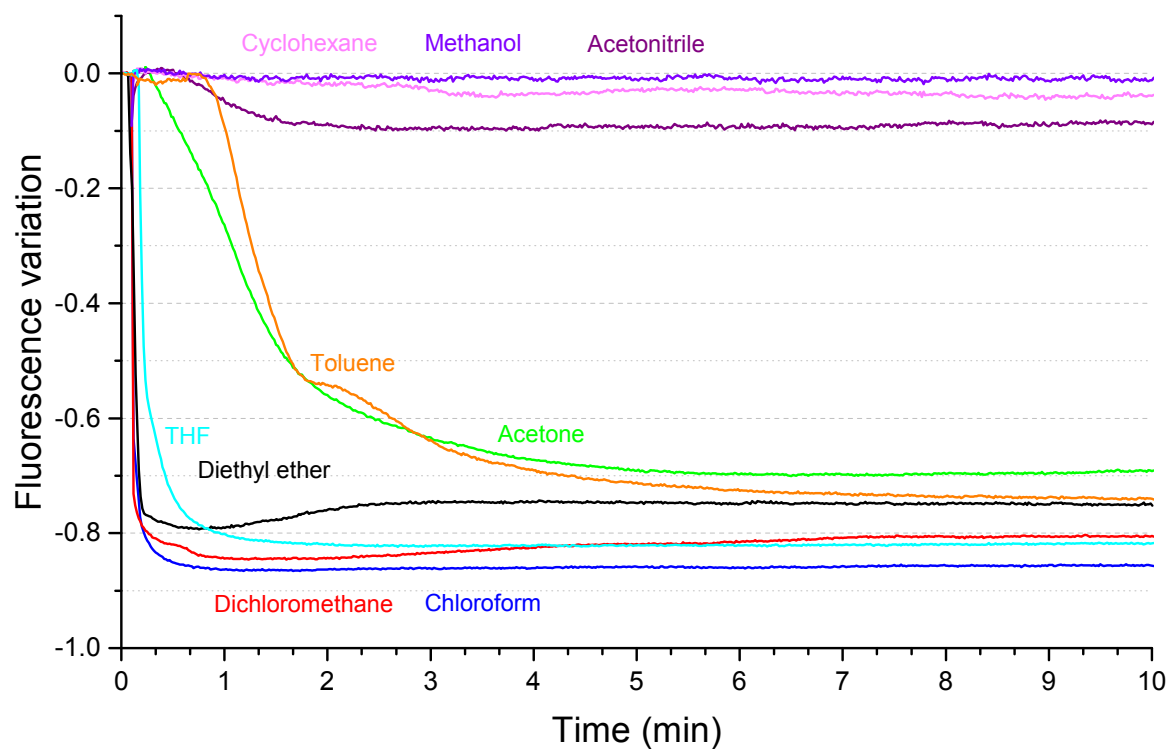

**Figure S2.** Variation of the fluorescence maximum intensity of P(STY-co-JCAEM)(0.06) films with exposure time to all VOCs investigated

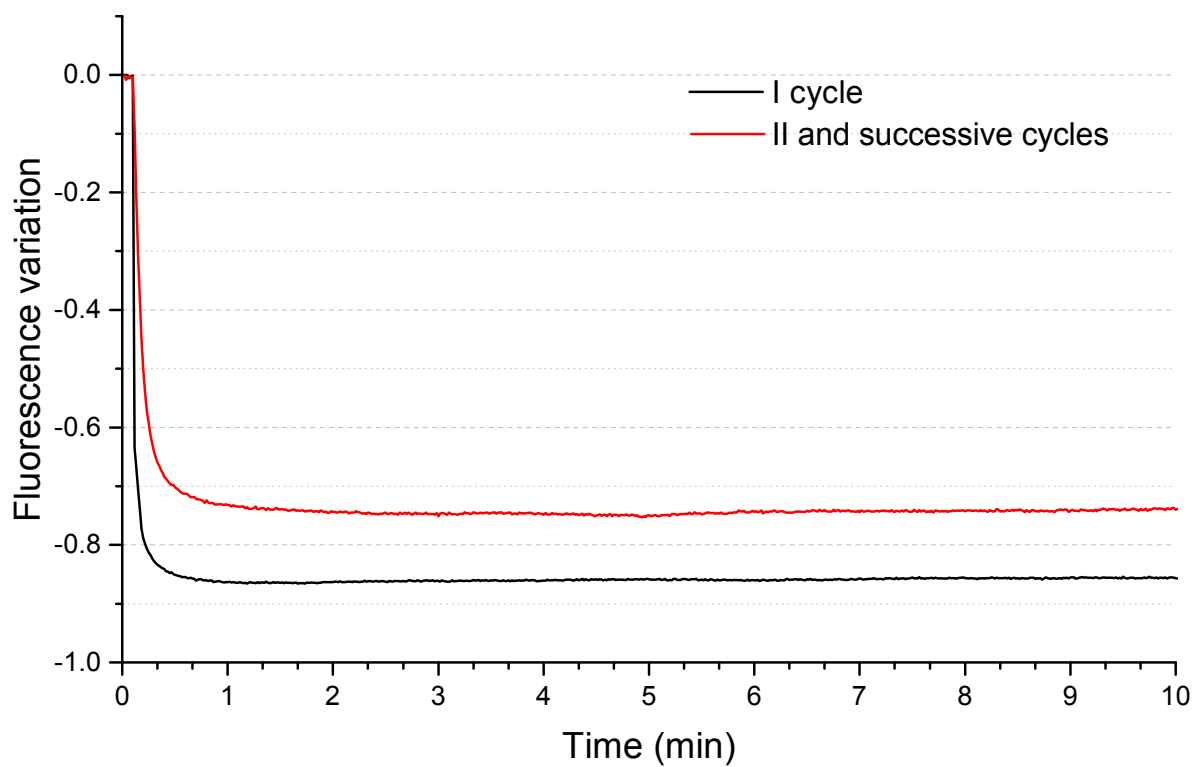

**Figure S3.** Variation of the fluorescence maximum intensity of P(STY-co-JCAEM)(0.06) films with exposure time for successive cycles of chloroform exposure
